# Supplementary material for: Sodium Tanshinone IIA Sulfonate Prevents Angiotensin II-Induced Differentiation of Human Atrial Fibroblasts into Myofibroblasts
Source: PubMed Central journal article supplement (PMC6081515; doi:10.1155/2018/6712585), 2018-07-24
Supplement: 6712585.f1.pdf [file 6712585.f1.pdf]

### Supplementary Figures:

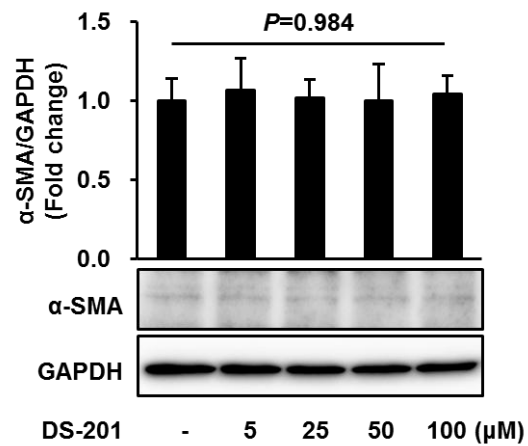

**Supplementary Figure 1:** The effects of DS-201 on  $\alpha$ -SMA expression. Atrial fibroblasts were exposed to DS-201 (0, 5, 25, 50 and 100  $\mu$ M) for 24 h. Expression of  $\alpha$ -SMA was analyzed by western blotting and representative images of 3 independent experiments are shown. The ratio of  $\alpha$ -SMA normalized to GAPDH was calculated. Data shown are mean values  $\pm$  SD and are expressed as fold changes.

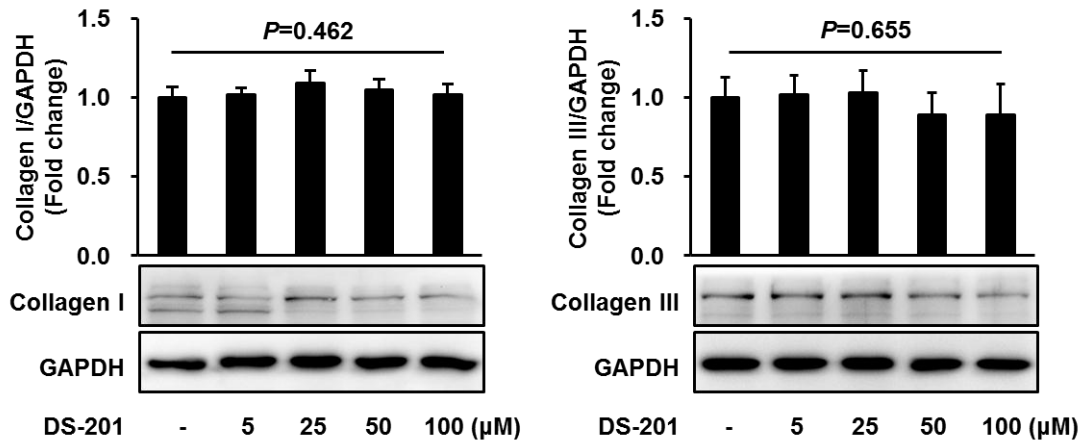

**Supplementary Figure 2:** The effects of DS-201 on collagen I and collagen III expression. Atrial fibroblasts were exposed to DS-201 (0, 5, 25, 50 and 100 μM) for 24 h. Expression of collagen I and collagen III was analyzed by western blotting and representative images of 3 independent experiments are shown. The ratio of collagen I and collagen III normalized to GAPDH was calculated. Data shown are mean values ± SD and are expressed as fold changes.

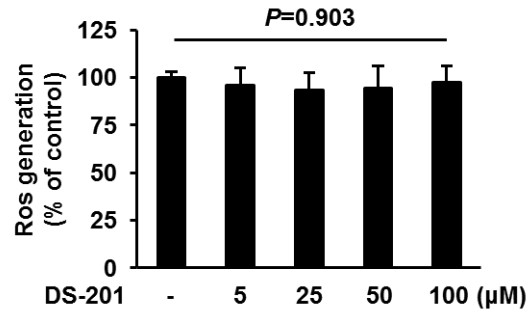

**Supplementary Figure 3:** The effects of DS-201 on ROS generation. Atrial fibroblasts were exposed DS-201 (0, 5, 25, 50 and 100 μM) for 1 h. Then cells were stained with DCFH-DA. The fluorescence intensity of DCF was measured at 488/525 nm using a microplate reader. Data shown are mean ± SD for 3 independent experiments and presented as % of the control value (first bar).

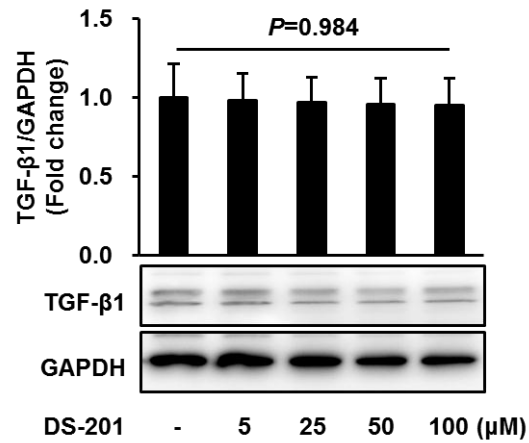

**Supplementary Figure 4:** The effects of DS-201 on TGF-β1 expression. Atrial fibroblasts were exposed to DS-201 (0, 5, 25, 50 and 100 μM) for 24 h. Expression of TGF-β1 was analyzed by western blotting and representative images of 3 independent experiments are shown. The ratio of TGF-β1 normalized to GAPDH was calculated. Data shown are mean values ± SD and are expressed as fold changes.
